# Supplementary material for: Isolation of Anti-Inflammatory and Epithelium Reinforcing Bacteroides and Parabacteroides Spp. from A Healthy Fecal Donor
Source: PubMed Central journal article supplement (PMC7230855; doi:10.3390/nu12040935), 2020-03-27
Supplement: nutrients-12-00935-s001.pdf [file nutrients-12-00935-s001.pdf]

**Table S1.** Bacterial isolates and their codes used in this study. Data from the whole genome sequencing (WGS) using MiSeq.

| Isolate                             | Code | Genome size (Mb) | GC content (%) | Number of contigs | Number of contigs >500 |
|-------------------------------------|------|------------------|----------------|-------------------|------------------------|
| <i>Parabacteroides distasonis</i> 1 | Pd1  | 5.0              | 45.1           | 98                | 65                     |
| <i>Parabacteroides distasonis</i> 2 | Pd2  | 5.0              | 45.1           | 89                | 65                     |
| <i>Parabacteroides distasonis</i> 3 | Pd3  | 5.0              | 45.1           | 142               | 107                    |
| <i>Parabacteroides distasonis</i> 4 | Pd4  | 5.0              | 45.1           | 120               | 94                     |
| <i>Parabacteroides distasonis</i> 5 | Pd5  | 5.0              | 45.1           | 223               | 197                    |
| <i>Parabacteroides distasonis</i> 6 | Pd6  | 5.0              | 45.1           | 812               | 721                    |
| <i>Bacteroides caccae</i> 1         | Bc1  | 5.2              | 42.7           | 88                | 69                     |
| <i>Bacteroides caccae</i> 2         | Bc2  | 5.2              | 42.7           | 83                | 64                     |
| <i>Bacteroides caccae</i> 3         | Bc3  | 5.2              | 42.7           | 81                | 69                     |
| <i>Bacteroides fragilis</i>         | Bf   | 5.4              | 43.4           | 126               | 58                     |
| <i>Bacteroides intestinalis</i> 1   | Bi1  | 6.0              | 42.7           | 94                | 78                     |
| <i>Bacteroides intestinalis</i> 2   | Bi2  | 6.0              | 42.6           | 4138              | 3005                   |
| <i>Bacteroides intestinalis</i> 3   | Bi3  | 6.0              | 42.7           | 88                | 77                     |
| <i>Bacteroides uniformis</i>        | Bu   | 4.7              | 46.5           | 154               | 130                    |
| <i>Bacteroides vulgatus</i> 1       | Bv1  | 5.2              | 42.3           | 335               | 310                    |
| <i>Bacteroides vulgatus</i> 2       | Bv2  | 4.4              | 43.4           | 2057              | 1813                   |
| <i>Bacteroides vulgatus</i> 3       | Bv3  | 5.2              | 42.3           | 138               | 113                    |
| <i>Bacteroides vulgatus</i> 4       | Bv4  | 5.2              | 42.3           | 159               | 112                    |
| <i>Bacteroides vulgatus</i> 5       | Bv5  | 5.2              | 42.3           | 216               | 119                    |
| <i>Bacteroides ovatus</i> 1         | Bo1  | 6.9              | 41.9           | 506               | 98                     |
| <i>Bacteroides ovatus</i> 2         | Bo2  | 6.9              | 42.0           | 286               | 91                     |
| <i>Bacteroides ovatus</i> 3         | Bo3  | 6.9              | 41.9           | 241               | 98                     |
| <i>Bacteroides ovatus</i> 4         | Bo4  | 6.9              | 41.9           | 212               | 139                    |
| <i>Bacteroides ovatus</i> 5         | Bo5  | 6.9              | 41.9           | 186               | 98                     |
| <i>Bacteroides ovatus</i> 6         | Bo6  | 6.9              | 42.0           | 157               | 97                     |
| <i>Bacteroides ovatus</i> 7         | Bo7  | 6.9              | 42.0           | 466               | 292                    |
| <i>Bacteroides ovatus</i> 8         | Bo8  | 6.9              | 42.0           | 196               | 102                    |
| <i>Bacteroides ovatus</i> 9         | Bo9  | 6.9              | 41.9           | 317               | 95                     |

A.

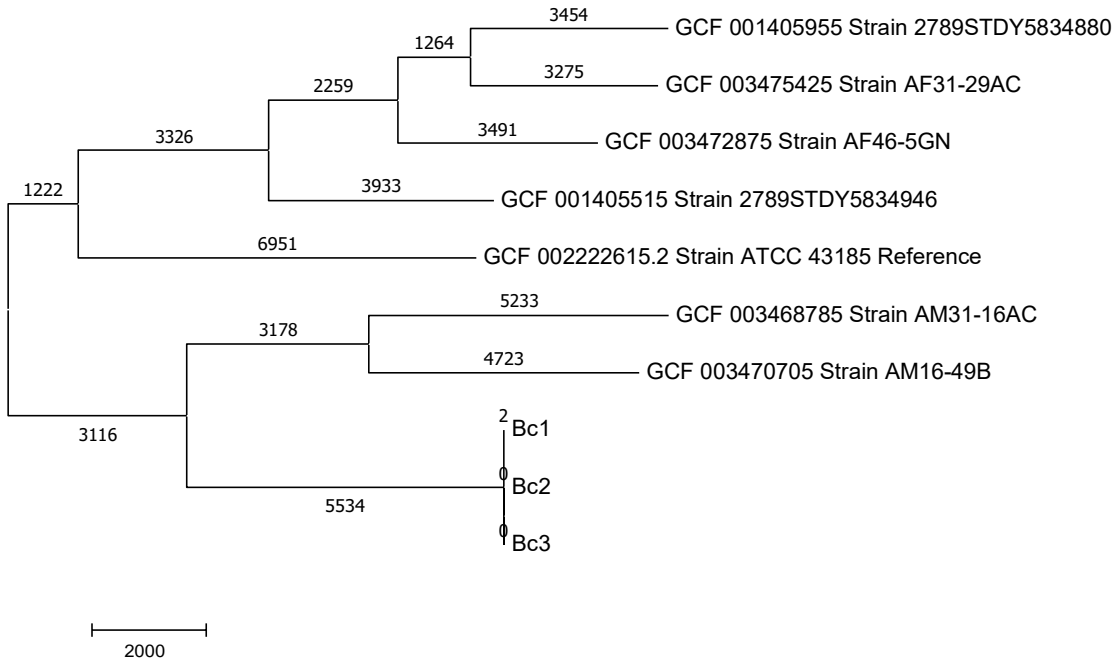

B.

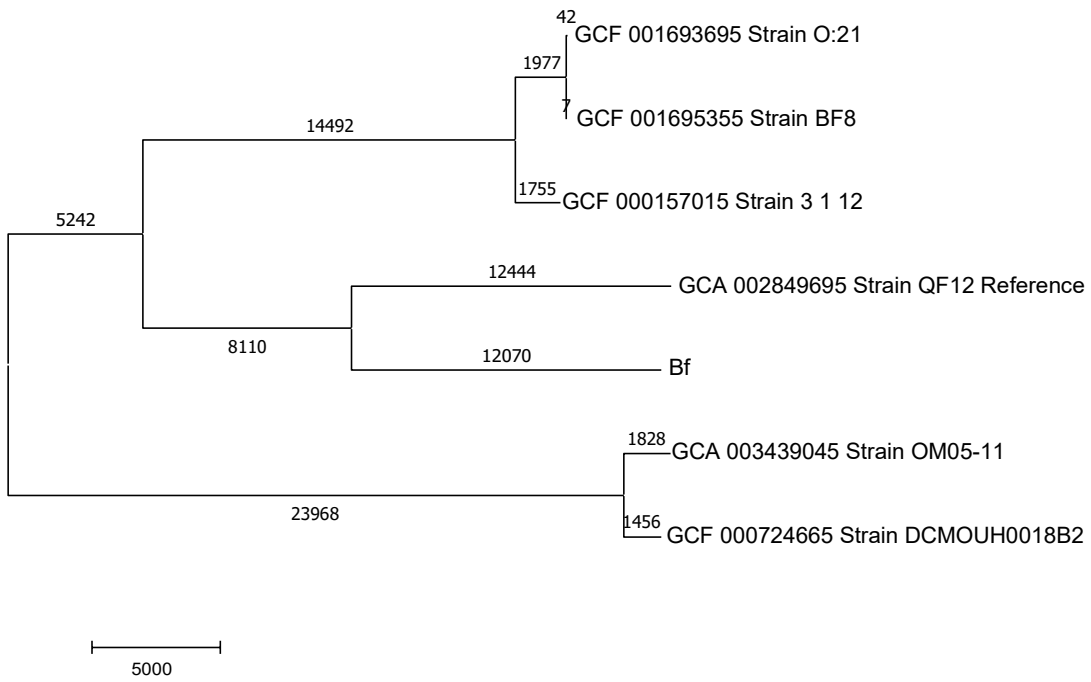

C.

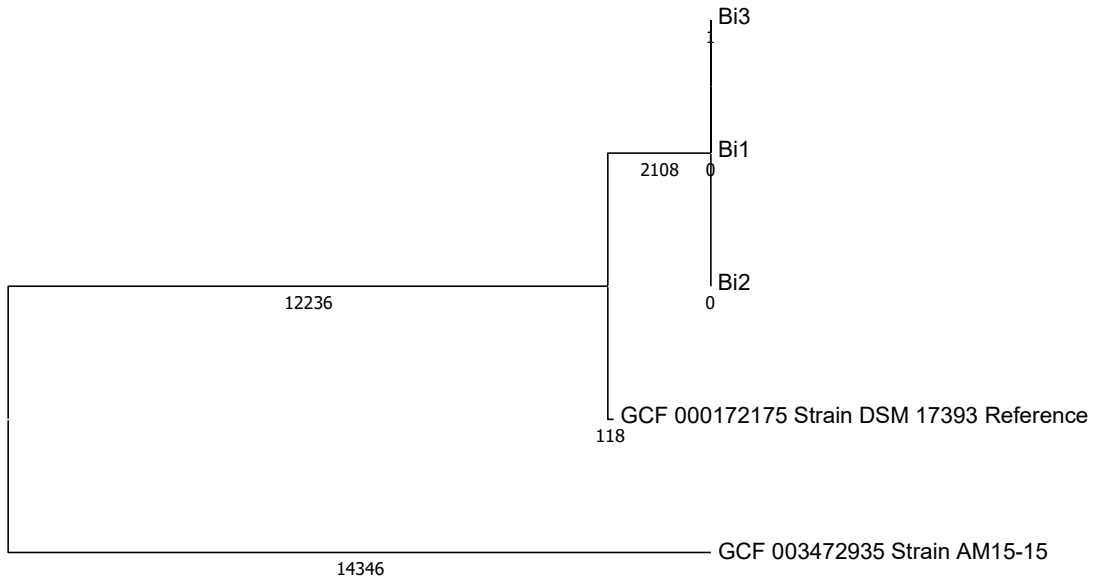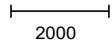

D.

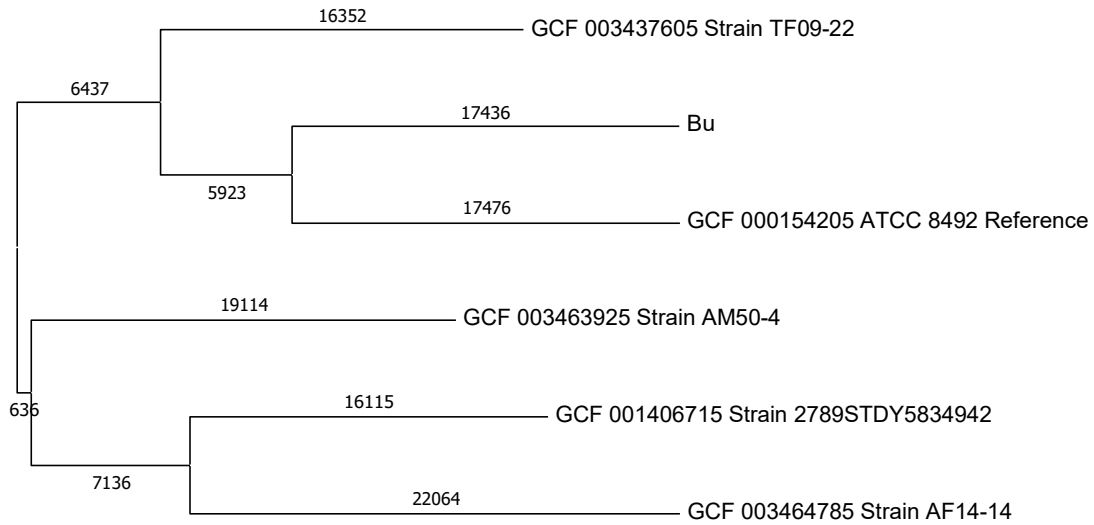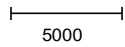

E.

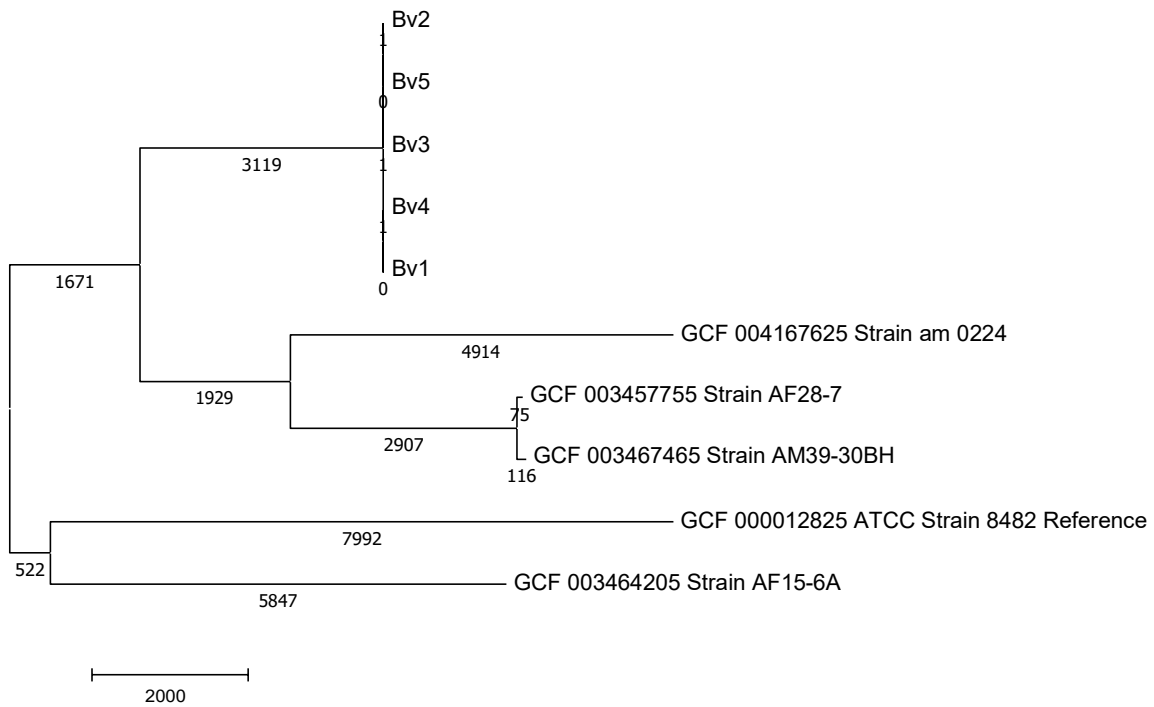

**Figure S1.** Estimates of evolutionary divergence by WGST (number of SNP differences per sequence) between the isolates belonging to the same species and previously published genomes (NCBI database). Bc = *B. caccae* (A), Bf = *B. fragilis* (B), Bi = *B. intestinalis* (C), Bu = *B. uniformis* (D), Bv = *B. vulgatus* (E). Numbers 1-9 refer to certain isolate. Figures for *P. distasonis* and *B. ovatus* are presented in the text
